# Supplementary material for: Anti-SARS-CoV-2 Activity of Polysaccharides Extracted from Halymenia floresii and Solieria chordalis (Rhodophyta)
Source: MDPI journal article supplement (doi:10.3390/md21060348), 2023-06-06
Supplement: s1 [file s1]

**Table S1.** Biochemical composition (% of dry weight) of Sulfated Polysaccharides fractions 1.1 to 1.6 of

| Fraction | Seaweed species  | Extraction-Purification |          | Neutral sugars | Sulfate groups | Uronic acids | 3,6-AG     | Protein     | Mineral matter |
|----------|------------------|-------------------------|----------|----------------|----------------|--------------|------------|-------------|----------------|
| 1.1      |                  | EAE                     | Dialysis | 24.7 ± 1.6     | 17.2 ± 1.9     | 1.9 ± 0.2    | 1.0 ± 0.02 | 2.7 ± 0.3   | 31.1 ± 1.2     |
| 1.2      | <i>Halymenia</i> | HWE                     | Dialysis | 24.9 ± 2.1     | 18.6 ± 2.3     | 2.1 ± 0.3*   | 1.2 ± 0.01 | 2.9 ± 0.2   | 33.9 ± 3.2     |
| 1.3      | <i>floresii</i>  | EAE                     | IEX      | 36.9 ± 0.04    | 9.4 ± 0.1      | 3.16 ± 0.05  | 0.6 ± 0.04 | 1.18 ± 0.03 | /              |
| 1.4      |                  | HWE                     | IEX      | 37.0 ± 0.05    | 10.1 ± 0.02*   | 3.13 ± 0.04  | 0.5 ± 0.02 | 1.12 ± 0.03 | /              |
| 1.5      | <i>Solieria</i>  | EAE                     | IEX      | 22.8 ± 0.7     | 15.4 ± 0.02    | 7.6 ± 0.1    | 8.4 ± 0.3  | 7.5 ± 0.1*  | /              |
| 1.6      | <i>chordalis</i> | HWE                     | IEX      | 23.7 ± 0.5     | 13.5 ± 0.4*    | 6.7 ± 0.09*  | 8.8 ± 0.08 | 6.2 ± 0.02  | /              |

the red seaweeds *Halymenia floresii* and *Solieria chordalis*

EAE: Enzyme-Assisted Extraction with protamex; HWE: Hot Water Extraction; IEX: Ion exchange Chromatography (DEAE-Sepharose fast-flow); 3,6-AG: Anhydrogalactose; /: Not determined; Data are means ± SD (n=3). \*Significantly different (p<0.05) between EAE and HWE by biochemical group (one-way ANOVA).

**Table S2.** Monosaccharide composition of polysaccharides Fractions 1.1 (Enzyme-Assisted Extraction) and 1.2 (Hot Water Extraction) of *Halymenia floresii*

| Fraction | Monosaccharide (% of the total) |               |            |            |            |            | Total (µg/mg dw) |
|----------|---------------------------------|---------------|------------|------------|------------|------------|------------------|
|          | Arabinose                       | Glucosamine   | Galactose  | Glucose    | Gluc-Ac    | NI         |                  |
| 1.1      | 8.19 ± 0.4                      | 0.17 ± 0.08*  | 69.9 ± 1.2 | 10.7 ± 1.2 | 2.33 ± 0.1 | 8.61 ± 0.3 | 139.8 ± 1.9      |
| 1.2      | 9.69 ± 0.6                      | 0.06 ± 0.009* | 72.5 ± 2.2 | 8.87 ± 0.4 | 2.51 ± 0.2 | 6.3 ± 1.3  | 137.9 ± 3.9      |

Gluc-Ac: Glucuronic acid; NI: Non-identified representing the sum of non-identified monosaccharides. Data are the mean of duplicates (n=2). \*Significantly different (p<0.05) by column between EAE and HWE for each monosaccharide (one-way non-parametric ANOVA Kruskal-Wallis).
